# Supplementary material for: Effect on Satisfactory Seizure Control and Heart Rate Variability of Thread-Embedding Acupuncture for Drug-Resistant Epilepsy: A Patient-Assessor Blinded, Randomized Controlled Trial
Source: Behav Neurol. 2023 Sep 19;2023:5871991. doi: 10.1155/2023/5871991 (PMC10522444; doi:10.1155/2023/5871991)
Supplement: Supplementary Materials — Table S1: details of acupuncture treatment based on the STRICTA 2010 checklist. Table S2: the CONSORT 2010 checklist with the Nonpharmacological Trials Extension to CONSORT. [file 5871991.f1.zip]

Archive with 2 entries (2 files):
- update_Table S1. the STRICTA 2010 checklist.docx
- update_Table S2. The CONSORT 2010 checklist.docx
